# Supplementary material for: Benchmarking and optimization of methods for the detection of identity-by-descent in high-recombining Plasmodium falciparum genomes
Source: eLife journal article supplement (doi:10.7554/elife.101924), 2025-01-06

## Supplementary File 2

Benchmarking and Optimization of Methods for the Detection of  
Identity-By-Descent in High-Recombining *Plasmodium falciparum*  
Genomes

Guo *et al.*

## Supplementary Tables

**Table S1. The default and optimized values for parameters used in inferring IBD segments via different callers.** A link to the source code and a citation of the corresponding article are provided for each IBD caller. For **hap-IBD**, **Refined IBD**, and **hmmIBD**, the parameters are used on the command line except that the parameter `rec_rate` of **hmmIBD** needs to be specified in the source code file `hmmIBD.c`. For **phased IBD** and **isoRelate**, the parameters are specified within a Python or R script. The details of how the parameters are specified can be found in the scripts on GitHub ([https://github.com/bguo068/bmibdcaller\\_simulations/tree/main/bin](https://github.com/bguo068/bmibdcaller_simulations/tree/main/bin)). Note that `mincm` and `minmaf` are values shared across IBD callers to allow fair comparisons.

| IBD caller                                                                                                                                                       | Program parameter      | Default value                                                                                                                      | Optimized/used value  |
|------------------------------------------------------------------------------------------------------------------------------------------------------------------|------------------------|------------------------------------------------------------------------------------------------------------------------------------|-----------------------|
| <b>hap-IBD</b><br><ul style="list-style-type: none"> <li>version: 1.0 23Apr20.f1a</li> <li>Browning <i>et al.</i> 2020</li> </ul>                                | min-output             | 2.0                                                                                                                                | mincm *               |
|                                                                                                                                                                  | min-seed               | 2.0                                                                                                                                | mincm                 |
|                                                                                                                                                                  | min-extend             | 1.0                                                                                                                                | 1.0                   |
|                                                                                                                                                                  | max-gap                | 1000                                                                                                                               | 1000                  |
|                                                                                                                                                                  | min-markers            | 100                                                                                                                                | 70                    |
| <b>hmmIBD</b><br><ul style="list-style-type: none"> <li>github.com/glipsnort/hmmIBD</li> <li>Commit: a2f796e</li> <li>Schaffner <i>et al.</i> 2018</li> </ul>    | rec_rate (in hmmIBD.c) | $7.4 \times 10^{-7}$                                                                                                               | $6.67 \times 10^{-7}$ |
|                                                                                                                                                                  | m                      | 5                                                                                                                                  | 5                     |
|                                                                                                                                                                  | n                      | no limit                                                                                                                           | 100                   |
|                                                                                                                                                                  |                        |                                                                                                                                    |                       |
| <b>isoRelate</b><br><ul style="list-style-type: none"> <li>github.com/bahlolab/isoRelate</li> <li>Commit: 109ee47</li> <li>Henden <i>et al.</i> 2018</li> </ul>  | isolate.max.missing    | 0.1                                                                                                                                | imputed               |
|                                                                                                                                                                  | snp.max.missing        | 0.1                                                                                                                                | imputed               |
|                                                                                                                                                                  | maf                    | 0.01                                                                                                                               | 0.1                   |
|                                                                                                                                                                  | minimum.length.bp      | 50,000                                                                                                                             | mincm $\times$ 15,000 |
|                                                                                                                                                                  | minsnp                 | 20                                                                                                                                 | 20                    |
| <b>Refined IBD</b><br><ul style="list-style-type: none"> <li>version: 17Jan20.102</li> <li>Browning <i>et al.</i> 2013</li> </ul>                                | length                 | 1.5                                                                                                                                | mincm                 |
|                                                                                                                                                                  | lod                    | 3.0                                                                                                                                | 1.6                   |
|                                                                                                                                                                  | scale                  | data-dep                                                                                                                           | data-dep              |
|                                                                                                                                                                  | window                 | 40                                                                                                                                 | 40                    |
|                                                                                                                                                                  | trim                   | 0.15                                                                                                                               | 0.15                  |
| <b>phased IBD</b><br><ul style="list-style-type: none"> <li>github.com/23andMe/phasedibd</li> <li>Commit: 9a7b949</li> <li>Freyman <i>et al.</i> 2021</li> </ul> | template               | $\begin{bmatrix} 1 & 0 & 1 & 0 \\ 0 & 1 & 0 & 1 \\ 1 & 1 & 0 & 0 \\ 0 & 0 & 1 & 1 \\ 1 & 0 & 0 & 1 \\ 0 & 1 & 1 & 0 \end{bmatrix}$ |                       |
|                                                                                                                                                                  |                        | $\begin{bmatrix} 0 & 1 & 1 & 1 \\ 1 & 0 & 1 & 1 \\ 1 & 1 & 0 & 1 \\ 1 & 1 & 1 & 0 \end{bmatrix}$                                   |                       |
|                                                                                                                                                                  |                        | L_m                                                                                                                                | 300                   |
|                                                                                                                                                                  |                        | L_f                                                                                                                                | 3.0                   |
|                                                                                                                                                                  |                        |                                                                                                                                    | 80                    |
|                                                                                                                                                                  |                        |                                                                                                                                    | mincm *               |

**Table S2. Grid/Line search to optimize IBD caller-specific parameters.** Column 2 lists the optimized parameters (other parameters are not explored). Column 3 shows the tested values for each parameter. Some parameters are optimized via two steps, such as coarse search (coarse) and fine-tuning (fine-tune). Column 4 provides comments on the impact of the values on IBD accuracy (measured as false positive rates (FP) and false negative rates (FN)).

| IBD caller  | Program parameter | Tested values                                                      | Comment                        |
|-------------|-------------------|--------------------------------------------------------------------|--------------------------------|
| hap-IBD     | max-gap           | (3, 30, 100, 300, 1000)                                            | little to no effect            |
|             | min-marker        | coarse: (3, 10, 30, 100)<br>finetune:(30, 40, 50, 60, 70, 80, 100) | optimal around 70              |
| hmmIBD      | m                 | (2, 5, 10)                                                         | little to no effect            |
|             | n                 | (10, 30, 100, 300, Inf)                                            | little to no effect            |
|             | min-maf           | (0.001, 0.01)                                                      | little to no effect            |
| isoRelate   | min-maf           | (0.01, 0.03, 0.1)                                                  | 0.1 reduces FN for longer IBD  |
|             | min-snp           | (1, 3, 10, 15, 20, 40, 80, 160)                                    | $\leq 40$ reduces FN           |
| Refined IBD | min-maf           | (0.01, 0.1)                                                        | little to no effect            |
|             | lod               | (1.1, 1.2, 1.4, 1.6, 1.8, 2, 3, 4, 8)                              | lowest FN at 1.6               |
|             | window            | (20, 40)                                                           | little to no effect            |
|             | trim              | (0.01, 0.02, 0.05, 0.08, 0.10, 0.12, 0.15)                         | little to no effect            |
| phased IBD  | template          | tolerate 1 or 2 mismatch in every 4 SNPs                           | optimal to tolerate 1 mismatch |
|             | L_m               | (50, 80, 90, 100, 110, 130, 150, 200, 250, 300)                    | optimal around 80              |
|             | min-maf           | (0.001, 0.01, 0.1)                                                 | optimal around 0.01            |

**Table S3. Isolates in the “multi-population” data set used in empirical validation.** Rows are counts of isolates from different locations (“Population” labels from MalariaGEN *Pf7* meta information table).

| Population | 2012 | 2013 | Total |
|------------|------|------|-------|
| AF-C       | 66   | 37   | 103   |
| AF-E       | 58   | 139  | 197   |
| AF-W       | 27   | 273  | 300   |
| AS-SE-E    | 75   | 25   | 100   |
| AS-SE-W    | 85   | 59   | 144   |
| OC-NG      | 17   | 40   | 57    |
| Total      | 328  | 573  | 901   |

**Table S4. Isolates in the “single-population” data set for “AS-SE-E” population used in empirical validation.** Rows are counts of isolates from different locations (“Country” labels from MalariaGEN *Pf7* meta information table); columns are counts of isolates collected in a given year.

| Country  | 2010 | 2011 | 2012 | Total |
|----------|------|------|------|-------|
| Cambodia | 61   | 82   | 43   | 186   |
| Laos     | 27   | 27   | 15   | 69    |
| Thailand | 0    | 0    | 1    | 1     |
| Vietnam  | 28   | 44   | 16   | 88    |
| Total    | 116  | 153  | 75   | 344   |

**Table S5. Isolates in the “single-population” data set for “AF-W-Ghana” population used in empirical validation.** Rows are counts of isolates from different locations (“admin level 1” labels from MalariaGEN *Pf7* meta information table); columns are counts of isolates collected in a given year.

| Admin level 1 | 2016 | 2017 | 2018 | Total |
|---------------|------|------|------|-------|
| Eastern       | 0    | 0    | 6    | 6     |
| Greater Accra | 14   | 13   | 57   | 84    |
| Upper East    | 63   | 199  | 212  | 474   |
| Volta         | 21   | 0    | 0    | 21    |
| Total         | 98   | 212  | 275  | 585   |

# Supplementary Data

**Data S2. Detailed IBD-level benchmarking results shown in heatmaps.** Each panel (a-r) represents the FN/FP rates for a specific combination of IBD callers (**hap**-IBD, **hmm**IBD, **isoRelate**, **phased** IBD, and **Refined** IBD), demographic models (single-population model, multiple-population model, and UK human demographic model), and recombination rates (human *versus* *Pf*) as indicated in the text above the panel. Note that benchmarking for genomes with human recombination rates was not performed for **hmm**IBD and **isoRelate** as they did not scale well for large genome sizes (in base pairs). For each heatmap, the searched parameters and their values are indicated as the *x* and *y* labels and tick labels, respectively; the labels in grey background on the top indicate the IBD length bin that was used to calculate FN/FP rates (labels in grey on the left); the bold labels in grey at the bottom show either different groups (e.g., coarse search or fine-tune) or the third parameter searched (such as min-maf=0.01 and min-maf=0.00).

a, **hap**-IBD, single population model, *Pf* recombination rate.

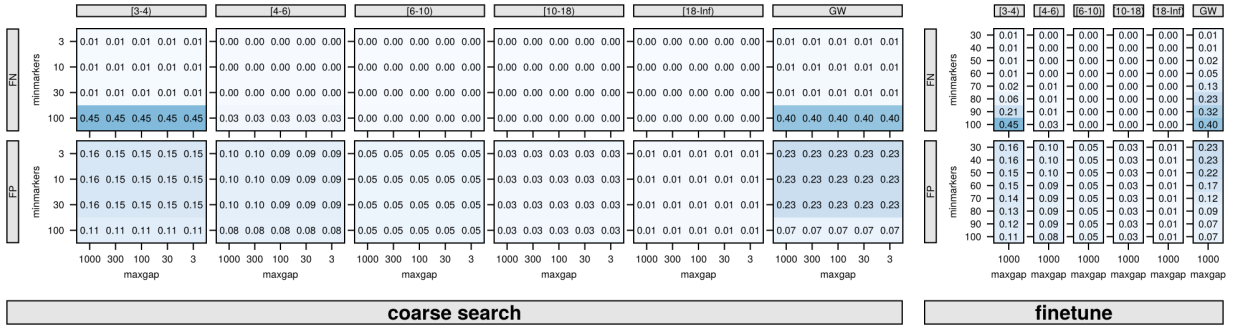

b, **hap**-IBD, multiple population model, *Pf* recombination rate.

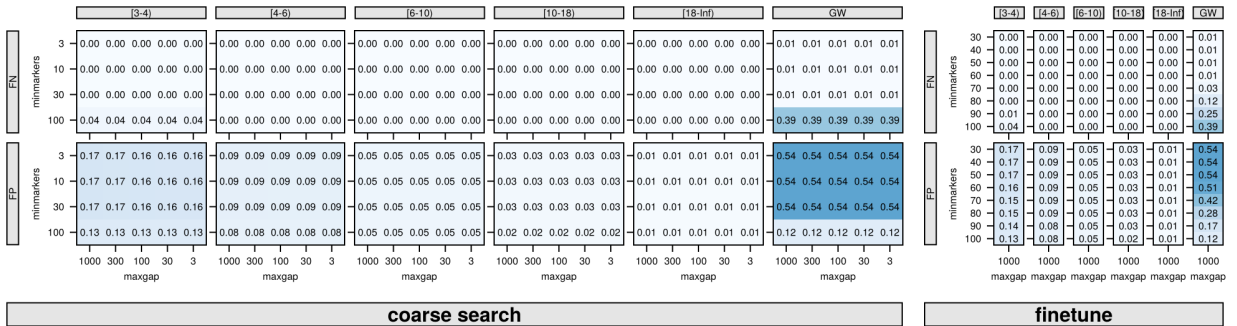

c, hap-IBD, UK human population model, Human recombination rate.

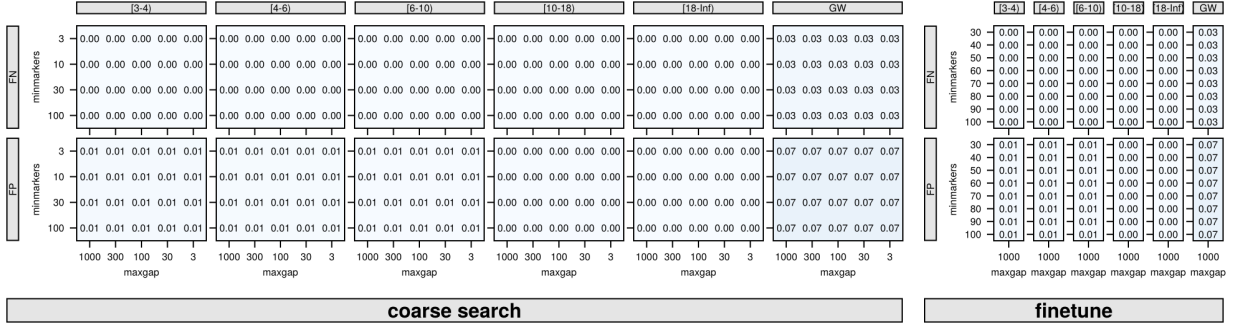

d, hap-IBD, UK human population model,  $P_f$  recombination rate.

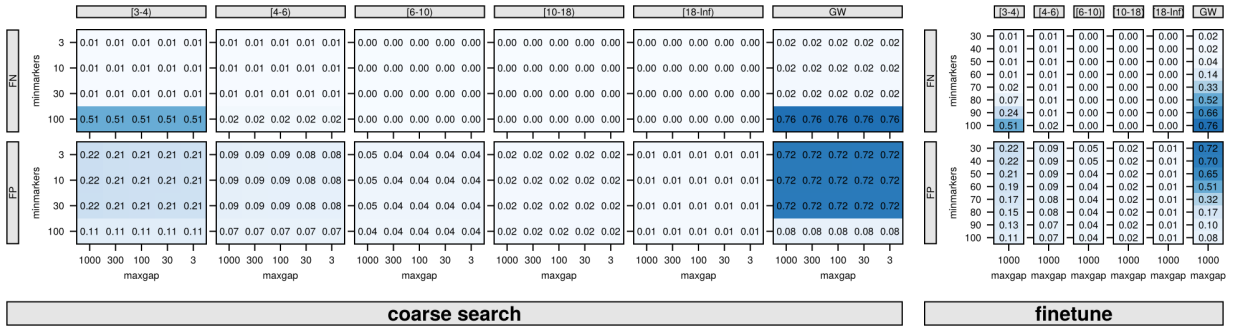

e, hmmIBD, single population model,  $P_f$  recombination rate.

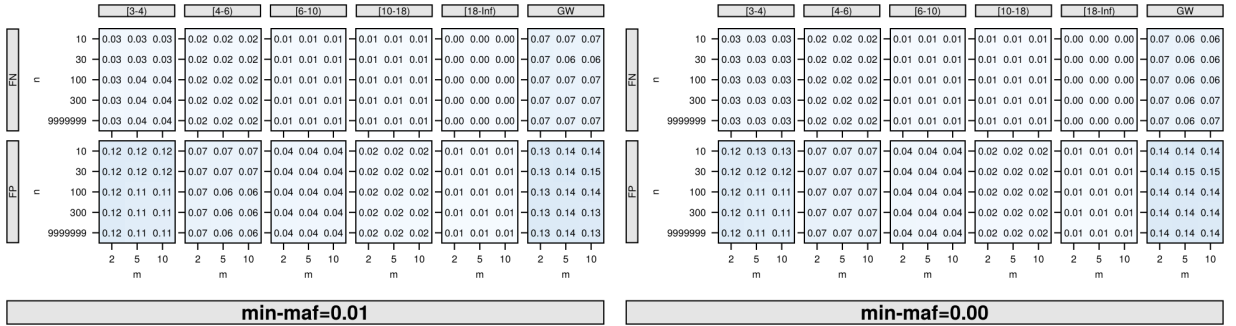

f, hmmIBD, multiple population model,  $P_f$  recombination rate.

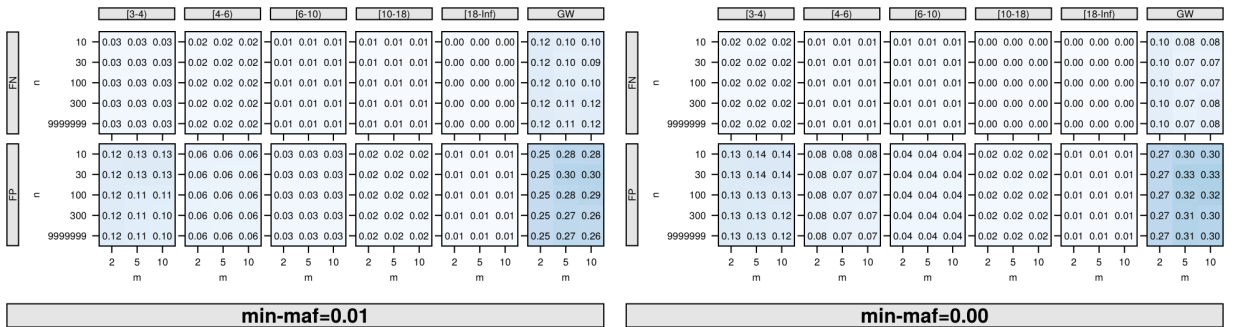

g, *hmmIBD*, UK human population model, *Pf* recombination rate.

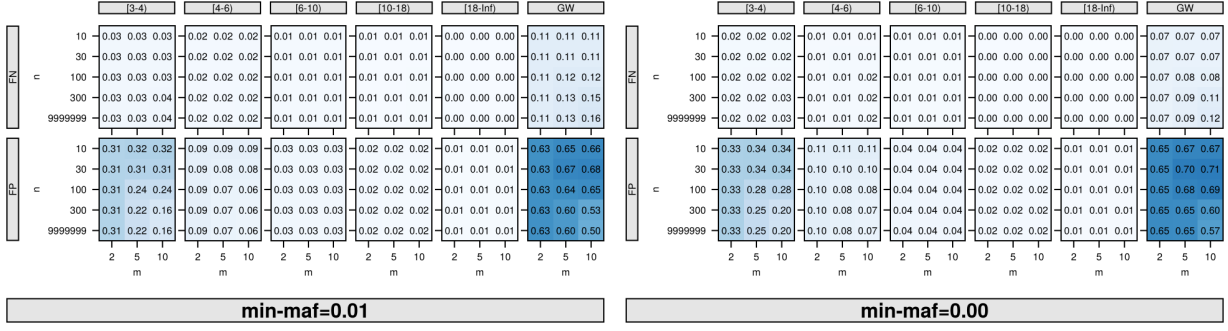

h, *isoRelate*, single population model, *Pf* recombination rate.

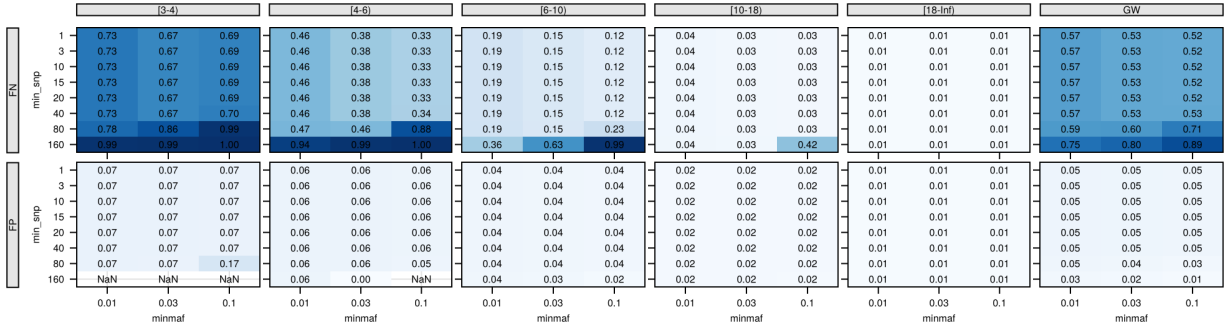

i, *isoRelate*, multiple population model, *Pf* recombination rate.

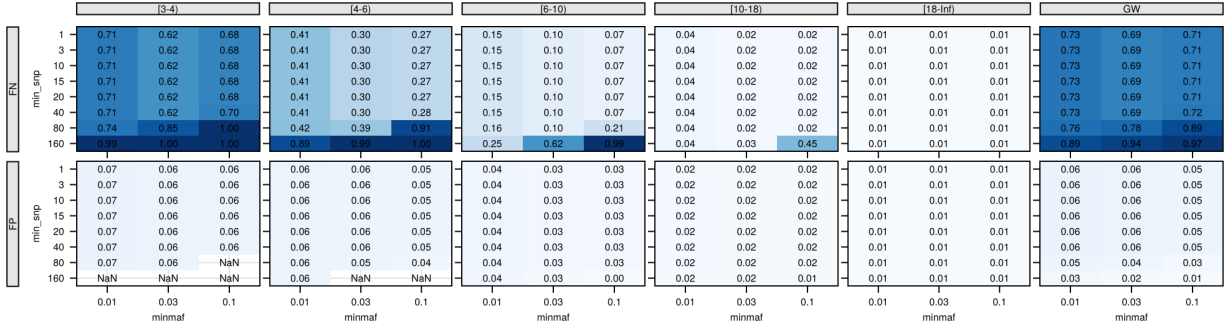

j, *isoRelate*, UK human population model, *Pf* recombination rate.

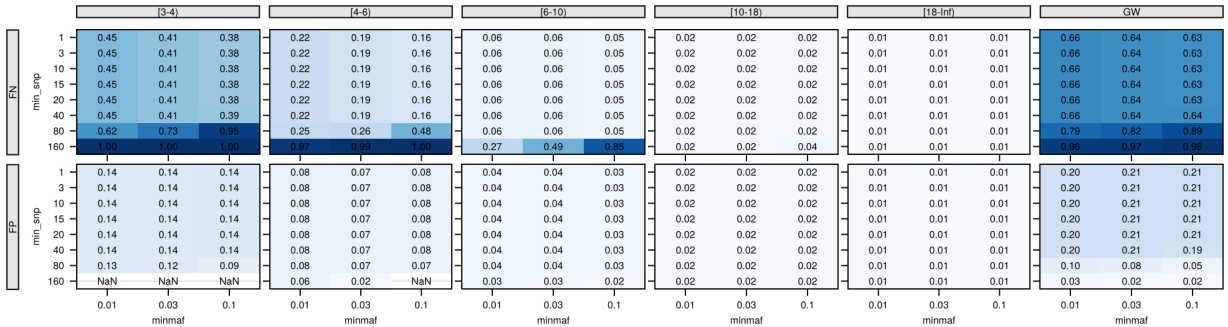



k, Refined IBD, single population model,  $P_f$  recombination rate.

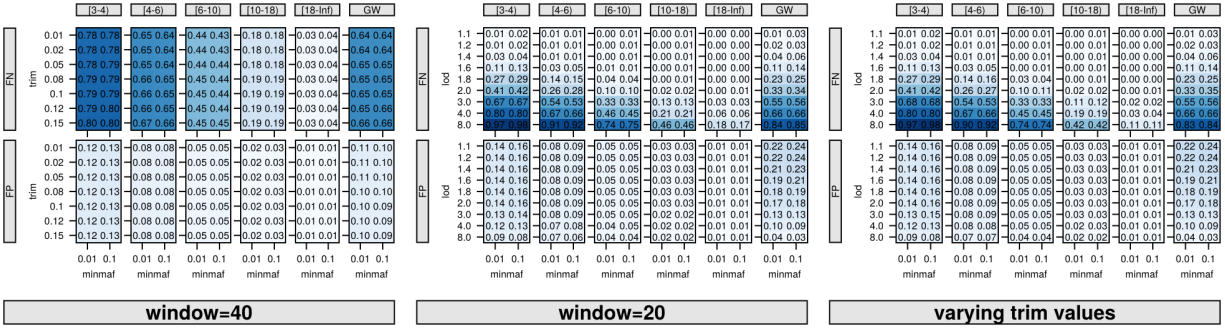

l, Refined IBD, multiple population model,  $P_f$  recombination rate.

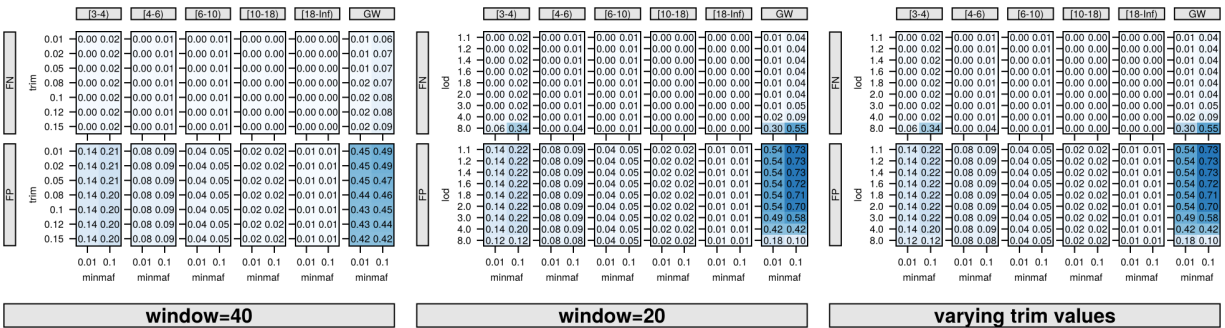

m, Refined IBD, UK human population model, Human recombination rate.

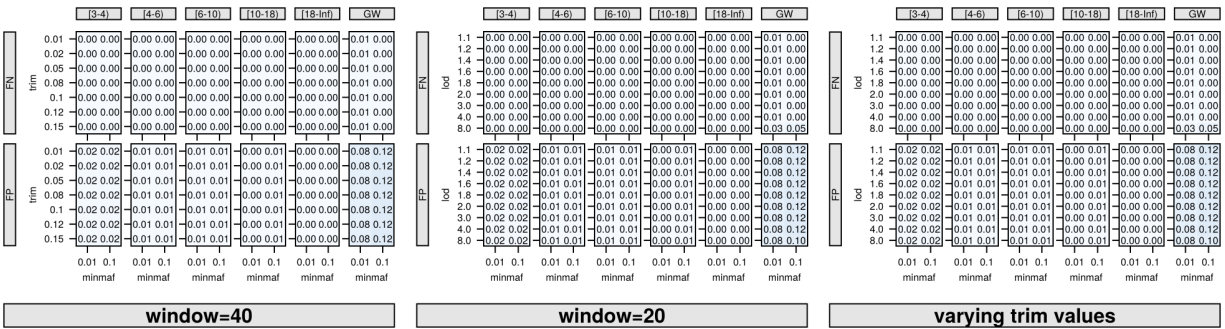

n, Refined IBD, UK human population model,  $P_f$  recombination rate.

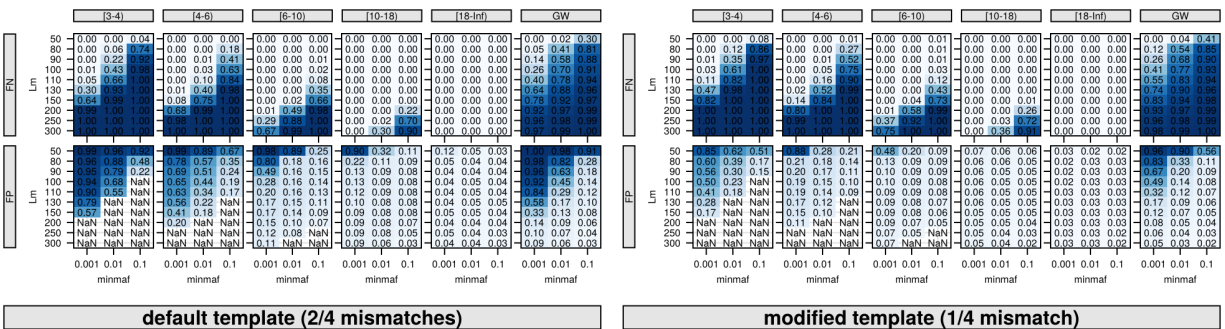



o, phased IBD, single population model,  $P_f$  recombination rate.

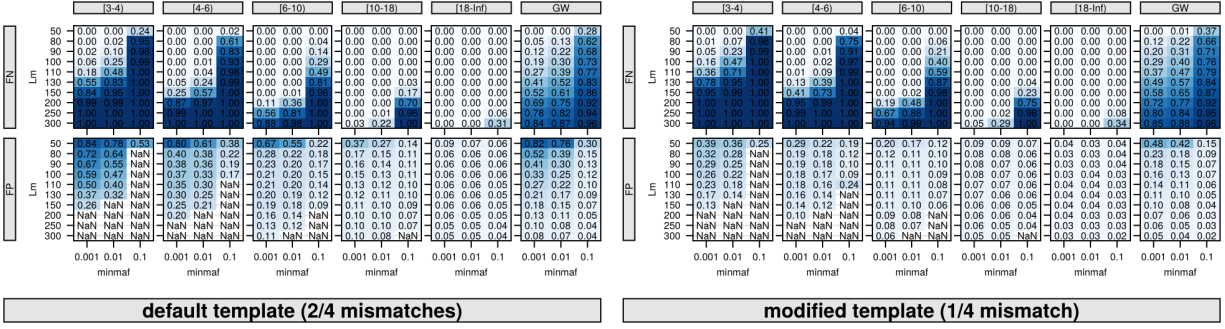

p, phased IBD, multiple population model,  $P_f$  recombination rate.

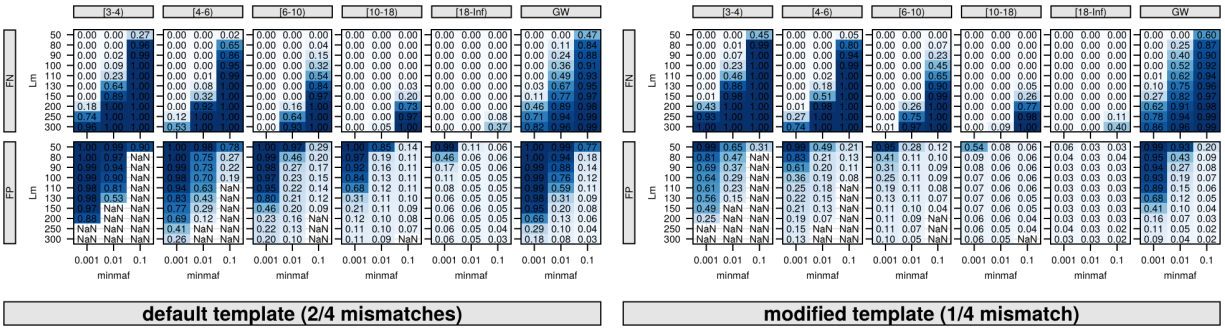

q, phased IBD, UK human population model, Human recombination rate.

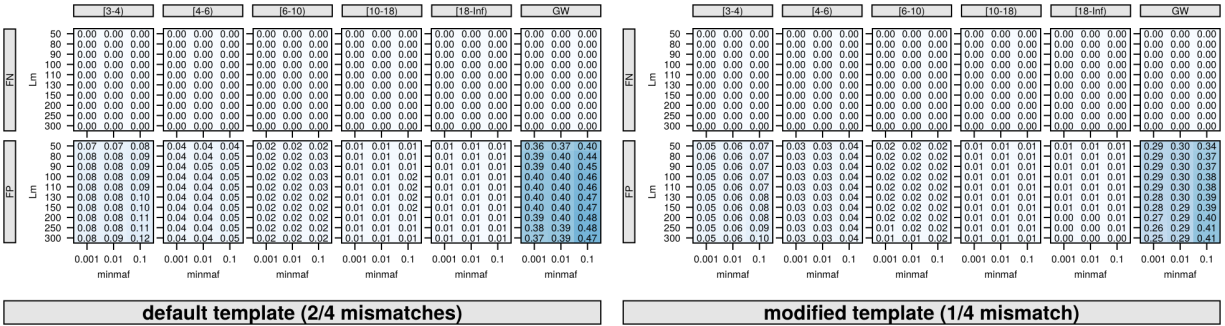

r, phased IBD, UK human population model,  $P_f$  recombination rate.

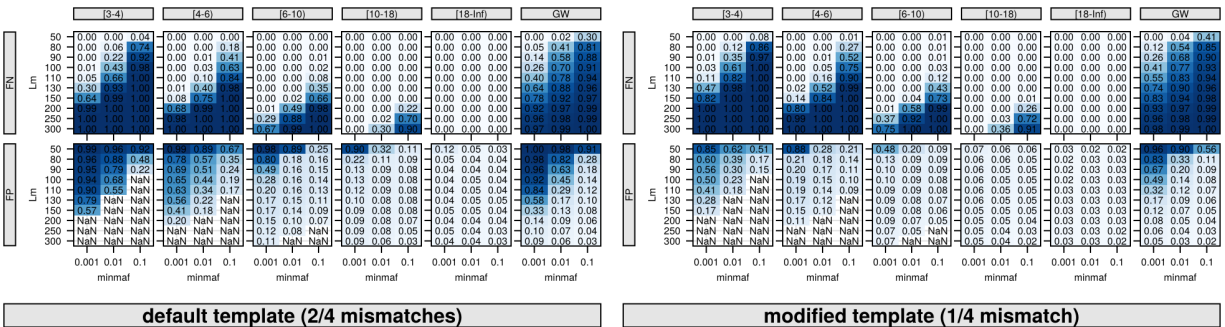

Supplement: supp2 [file elife-101924-supp2-v1.pdf]
